# Supplementary material for: Ligand-free palladium-catalyzed intramolecular Heck reaction of secondary benzylic bromides
Source: Royal Society of Chemistry journal article supplement (doi:10.1039/c1ob05231d), 2011-01-01

# Ligand-free Palladium-catalyzed Intramolecular Heck Reaction of Secondary Benzylic Bromides

**Wei Zhou, Guanghui An, Guangqian Zhang, Jianlin Han\***  
**and Yi Pan\***

*School of Chemistry and Chemical Engineering, State Key Laboratory of  
Coordination Chemistry, Nanjing University, Nanjing 210093, P.R. China.*

E-mail: hanjl@nju.edu.cn, yipan@nju.edu.cn

## Supporting information

### Table of contents

|                                                                                   |           |
|-----------------------------------------------------------------------------------|-----------|
| <b>1. General Information</b> .....                                               | <b>S2</b> |
| <b>2. Typical procedure for the intramolecular Heck reaction</b> .....            | <b>S2</b> |
| <b>3. The ORTEP diagram drawing of 2a</b> .....                                   | <b>S2</b> |
| <b>4. Spectral data for products 2, 3, 4</b> .....                                | <b>S3</b> |
| <b>5. <sup>1</sup>H and <sup>13</sup>C NMR spectra for products 2, 3, 4</b> ..... | <b>S9</b> |

**1. General Information.** Solvents were dried and distilled prior to use. Melting points were uncorrected. IR spectra were collected on Bruker Vector 22 in KBr pellets.  $^1\text{H}$  and  $^{13}\text{C}$  NMR (TMS used as internal standard) spectra were collected in  $\text{CDCl}_3$  with a Bruker ARX 300 spectrometer. High resolution mass spectra for all the new compounds were done by a Micromass Q-ToF instrument (ESI). Thin layer chromatography was carried out on Silica Gel 60 F-254 TLC plates. 20 cm  $\times$  20 cm Gel 60 F-254 TLC plates were used for Isolation. Flash chromatography was performed on silica gel 60 (200-300 mesh).

**2. Typical procedure for the intramolecular Heck reaction.** Into a dry vial was added substrate **1** (0.5 mmol), freshly dried  $\text{K}_2\text{CO}_3$  (138 mg, 1 mmol),  $\text{Pd}(\text{OAc})_2$  (1.1 mg, 1 mol%) and freshly distilled DMF (1.0 mL) under a nitrogen atmosphere. The mixture was stirred at 60  $^\circ\text{C}$  for 24 h. After cooling, the reaction was quenched with water (10 mL). The aqueous phase was extracted with EtOAc (3  $\times$  20 mL). The combined organic layers were washed with brine, dried with anhydrous  $\text{Na}_2\text{SO}_4$ , concentrated and purified by column (EtOAc/petroleum ether, 1:20 v/v) to give the product.

**3. The ORTEP diagram drawing of 2a.**

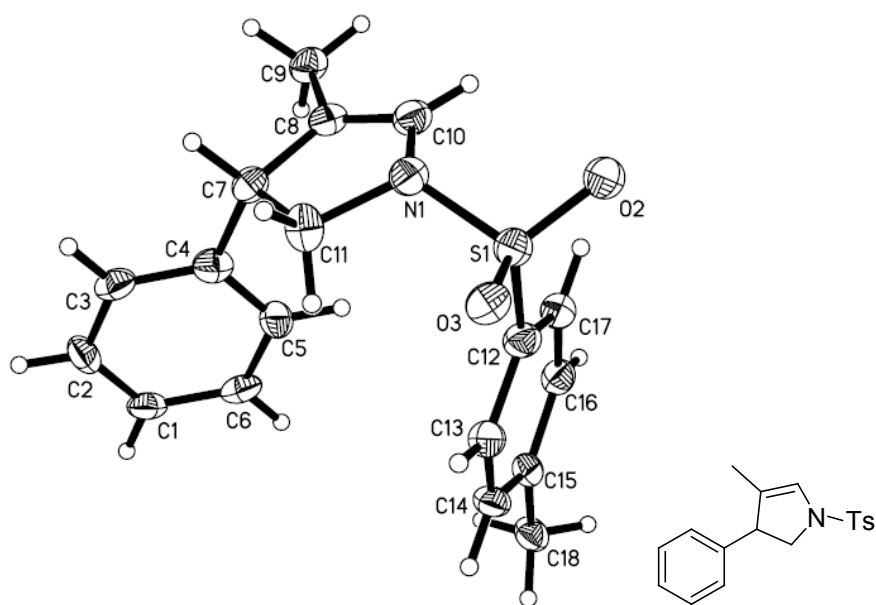

#### 4. Spectral data for 2, 3, 4.

**4-methyl-3-phenyl-1-tosyl-2,3-dihydro-1H-pyrrole (2a)** White solid, m.p. 64–66 °C; <sup>1</sup>H NMR (300 MHz, CDCl<sub>3</sub>): δ = 7.67–7.71 (m, 2H), 7.34–7.38 (m, 2H), 7.14–7.17 (m, 3H), 6.74–6.77 (m, 2H), 6.26–6.27 (m, 1H), 3.94 (t, *J* = 10.7 Hz, 1H), 3.71–3.77 (m, 1H), 3.38 (dd, *J* = 6.1, 10.8 Hz, 1H), 2.48 (s, 3H), 1.43 (t, *J* = 1.3 Hz, 3H) ppm; <sup>13</sup>C NMR (75 MHz, CDCl<sub>3</sub>): δ = 143.52, 141.44, 131.99, 129.42, 128.24, 127.58, 126.98, 126.61, 125.26, 124.72, 55.68, 51.71, 21.17, 11.50 ppm; IR (KBr): *v* = 3094, 2947, 1662, 1597, 1493 cm<sup>-1</sup>; MS (HRMS/[M+Na]<sup>+</sup>) Calcd for C<sub>18</sub>H<sub>19</sub>NO<sub>2</sub>SNa: 336.1029, Found: 336.1019.

**3-(4-chlorophenyl)-4-methyl-1-tosyl-2,3-dihydro-1H-pyrrole (2b)** Colorless oil; <sup>1</sup>H NMR (300 MHz, CDCl<sub>3</sub>): δ = 7.67–7.69 (m, 2H), 7.35 (d, *J* = 8.0 Hz, 2H), 7.10–7.15 (m, 2H), 6.67–6.72 (m, 2H), 6.25–6.26 (m, 1H), 3.92 (t, *J* = 11.0 Hz, 1H), 3.74–3.68 (m, 1H), 3.34 (dd, *J* = 6.0, 10.9 Hz, 1H), 2.49 (s, 3H), 1.42 (t, *J* = 1.2 Hz, 3H) ppm; <sup>13</sup>C NMR (75 MHz, CDCl<sub>3</sub>): δ = 143.93, 140.36, 132.82, 132.46, 129.77, 128.80, 128.72, 127.98, 126.04, 124.45, 55.88, 51.57, 21.62, 11.85 ppm; IR (KBr): *v* = 2921, 1489 cm<sup>-1</sup>; MS (HRMS/[M+Na]<sup>+</sup>) Calcd for C<sub>18</sub>H<sub>18</sub>ClNO<sub>2</sub>SNa: 370.0639, Found: 370.0629.

**3-(3-chlorophenyl)-4-methyl-1-tosyl-2,3-dihydro-1H-pyrrole (2c)** White solid, m.p. 86–88 °C; <sup>1</sup>H NMR (300 MHz, CDCl<sub>3</sub>): δ = 7.68 (d, *J* = 8.3 Hz, 2H), 7.37 (d, *J* = 8.0 Hz, 2H), 7.07–7.17 (m, 2H), 6.70–6.72 (m, 1H), 6.61–6.62 (m, 1H), 6.26–6.27 (m, 1H), 3.95 (t, *J* = 11.0 Hz, 1H), 3.73–3.69 (m, 1H), 3.33 (dd, *J* = 6.0,

11.0 Hz, 1H), 2.48 (s, 3H), 1.43 (t,  $J = 1.2$  Hz, 3H) ppm;  $^{13}\text{C}$  NMR (75 MHz,  $\text{CDCl}_3$ ):  $\delta = 144.18, 144.00, 134.62, 132.14, 129.89, 129.85, 127.94, 127.35, 127.28, 126.25, 125.83, 124.17, 55.75, 51.88, 21.75, 11.92$  ppm; IR (KBr):  $\nu = 2979, 1650, 1476$   $\text{cm}^{-1}$ ; MS (HRMS/[ $\text{M}+\text{Na}$ ] $^+$ ) Calcd for  $\text{C}_{18}\text{H}_{18}\text{ClNO}_2\text{SNa}$ : 370.0639, Found: 370.0646.

### **3-(2-chlorophenyl)-4-methyl-1-tosyl-2,3-dihydro-1H-pyrrole (2d)**

White solid, m.p. 122–124 °C;  $^1\text{H}$  NMR (300 MHz,  $\text{CDCl}_3$ ):  $\delta = 7.66$  (d,  $J = 8.3$  Hz, 2H), 7.26–7.32 (m, 3H), 7.11–7.13 (m, 1H), 7.01–7.08 (m, 1H), 6.63–6.64 (m, 1H), 6.31–6.32 (m, 1H), 4.26–4.31 (m, 1H), 3.92 (t,  $J = 10.8$  Hz, 1H), 3.38 (dd,  $J = 5.2, 11.0$  Hz, 1H), 2.46 (s, 3H), 1.52 (t,  $J = 1.2$  Hz, 3H) ppm;  $^{13}\text{C}$  NMR (75 MHz,  $\text{CDCl}_3$ ):  $\delta = 143.83, 139.11, 133.56, 132.57, 129.71, 129.41, 128.20, 128.08, 127.90, 127.24, 126.86, 123.84, 55.25, 47.77, 21.61, 12.09$  ppm; IR (KBr):  $\nu = 2975, 1469$   $\text{cm}^{-1}$ ; MS (HRMS/[ $\text{M}+\text{Na}$ ] $^+$ ) Calcd for  $\text{C}_{18}\text{H}_{18}\text{ClNO}_2\text{SNa}$ : 370.0639, Found: 370.0650.

### **4-methyl-3-p-tolyl-1-tosyl-2,3-dihydro-1H-pyrrole (2e)**

White solid, m.p. 46–48 °C;  $^1\text{H}$  NMR (300 MHz,  $\text{CDCl}_3$ ):  $\delta = 7.69$  (d,  $J = 8.3$  Hz, 2H), 7.36 (d,  $J = 8.0$  Hz, 2H), 6.97 (d,  $J = 8.0$  Hz, 2H), 6.64 (d,  $J = 7.9$  Hz, 2H), 6.23–6.24 (m, 1H), 3.92 (t,  $J = 10.7$  Hz, 1H), 3.68–3.74 (m, 1H), 3.34 (dd,  $J = 6.2, 10.8$  Hz, 1H), 2.49 (s, 3H), 2.28 (s, 3H), 1.43–1.41 (m, 3H) ppm;  $^{13}\text{C}$  NMR (75 MHz,  $\text{CDCl}_3$ ):  $\delta = 143.76, 138.79, 136.64, 132.44, 129.71, 129.31, 128.02, 127.31, 125.48, 125.16, 56.10, 51.83, 21.66, 21.06, 11.92$  ppm; IR (KBr):  $\nu = 2925, 2855, 1463$   $\text{cm}^{-1}$ ; MS (HRMS/[ $\text{M}+\text{Na}$ ] $^+$ ) Calcd for  $\text{C}_{19}\text{H}_{21}\text{NO}_2\text{SNa}$ : 350.1185, Found: 350.1194.

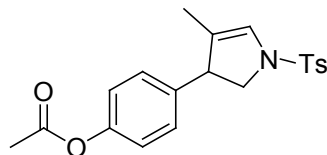

**4-(4-methyl-1-tosyl-2,3-dihydro-1H-pyrrol-3-yl)phenyl**

**acetate (2f)** Colorless oil.  $^1\text{H}$  NMR (300 MHz,  $\text{CDCl}_3$ ):  $\delta$  = 7.69-7.65 (m, 2H), 7.34 (d,  $J$  = 7.7 Hz, 2H), 6.90-6.85 (m, 2H), 6.77-6.73 (m, 2H), 6.25-6.24 (t,  $J$  = 1.6 Hz, 1H), 3.91 (t,  $J$  = 10.8 Hz, 1H), 3.77-3.71 (m, 1H), 3.34 (dd,  $J$  = 6.0, 10.8 Hz, 1H), 2.46 (s, 3H), 2.27 (s, 3H), 1.42 (t,  $J$  = 1.4 Hz, 3H) ppm;  $^{13}\text{C}$  NMR (75 MHz,  $\text{CDCl}_3$ ):  $\delta$  = 169.42, 149.60, 143.90, 139.29, 132.38, 129.79, 128.36, 127.98, 125.85, 124.75, 121.71, 55.96, 51.60, 21.61, 21.14, 11.94 ppm; IR (KBr):  $\nu$  = 2923, 1758, 1597, 1503  $\text{cm}^{-1}$ ; MS (HRMS/[ $\text{M}+\text{Na}$ ] $^+$ ) Calcd for  $\text{C}_{20}\text{H}_{21}\text{NO}_4\text{SNa}$ : 394.1084, Found: 394.1080.

**3-(4-tert-butylphenyl)-4-methyl-1-tosyl-2,3-dihydro-1H-pyrrole**

**(2g)** White solid, m.p. 104-106 °C.  $^1\text{H}$  NMR (300 MHz,  $\text{CDCl}_3$ ):  $\delta$  = 7.73-7.68 (m, 2H), 7.36 (d,  $J$  = 7.9 Hz, 2H), 7.20-7.16 (m, 2H), 6.71-6.66 (m, 2H), 6.26-6.25 (m, 1H), 3.93 (t,  $J$  = 10.6 Hz, 1H), 3.76-3.70 (m, 1H), 3.38 (dd,  $J$  = 6.2, 10.7 Hz, 1H), 2.50 (s, 3H), 1.44 (t,  $J$  = 1.4 Hz, 3H), 1.29 (s, 9H) ppm;  $^{13}\text{C}$  NMR (75 MHz,  $\text{CDCl}_3$ ):  $\delta$  = 149.85, 143.75, 138.66, 132.56, 129.77, 128.04, 127.05, 125.49, 125.46, 125.26, 56.05, 51.74, 34.41, 31.36, 21.66, 12.03 ppm; IR (KBr):  $\nu$  = 2960, 2868, 1596, 1509  $\text{cm}^{-1}$ ; MS (HRMS/[ $\text{M}+\text{Na}$ ] $^+$ ) Calcd for  $\text{C}_{22}\text{H}_{27}\text{NO}_2\text{SNa}$ : 392.1655, Found: 392.1666.

**4-(4-methyl-1-tosyl-2,3-dihydro-1H-pyrrol-3-yl)benzotrile**

**e (2h)** White solid, m.p. 144-146 °C;  $^1\text{H}$  NMR (300 MHz,  $\text{CDCl}_3$ ):  $\delta$  = 7.65-7.69 (m, 2H), 7.43-7.47 (m, 2H), 7.35 (d,  $J$  = 7.8 Hz, 2H), 6.90-6.87 (m, 2H), 6.29-6.30 (m, 1H), 3.91 (t,  $J$  = 10.8 Hz, 1H), 3.75-3.80 (m, 1H), 3.35-3.40 (dd,  $J$  = 5.2, 10.9 Hz, 1H), 2.49 (s, 3H), 1.42 (t,  $J$  = 1.1 Hz, 3H) ppm;  $^{13}\text{C}$  NMR (75 MHz,  $\text{CDCl}_3$ ):  $\delta$  =

147.32, 144.16, 132.54, 132.23, 129.87, 128.19, 127.98, 126.71, 123.75, 118.66, 111.04, 55.55, 52.09, 21.68, 11.93 ppm; IR (KBr):  $\nu = 2924, 2882, 2223, 1601 \text{ cm}^{-1}$ ; MS (HRMS/[M+Na]<sup>+</sup>) Calcd for C<sub>19</sub>H<sub>18</sub>N<sub>2</sub>O<sub>2</sub>SNa: 361.0981, Found: 361.0973.

**4-(4-methyl-1-tosyl-2,5-dihydro-1H-pyrrol-3-yl)benzotrile**

**(3h)** White solid, m.p. 168–170 °C; <sup>1</sup>H NMR (300 MHz, CDCl<sub>3</sub>):  $\delta = 7.78\text{-}7.73$  (m, 2H), 7.64-7.60 (m, 2H), 7.33 (d,  $J = 7.8$  Hz, 2H), 7.30-7.27 (m, 2H), 4.39-4.44 (m, 2H), 4.20-4.22 (m, 2H), 2.43 (s, 3H), 1.81 (s, 3H) ppm; <sup>13</sup>C NMR (75 MHz, CDCl<sub>3</sub>):  $\delta = 143.82, 138.41, 133.82, 132.81, 132.33, 129.95, 128.67, 128.07, 127.57, 118.62, 111.13, 60.07, 57.18, 21.61, 13.05$  ppm; IR (KBr):  $\nu = 2921, 2853, 2226, 1602 \text{ cm}^{-1}$ ; MS (HRMS/[M+Na]<sup>+</sup>) Calcd for C<sub>19</sub>H<sub>18</sub>N<sub>2</sub>O<sub>2</sub>SNa: 361.0981, Found: 361.0987.

**4-methyl-3-phenyl-1-(phenylsulfonyl)-2,3-dihydro-1H-pyrrole (2i)**

White solid, m.p. 143-145 °C. <sup>1</sup>H NMR (300 MHz, CDCl<sub>3</sub>):  $\delta = 7.85\text{-}7.80$  (m, 2H), 7.67-7.64 (m, 1H), 7.60-7.55 (m, 2H), 7.18-7.15 (m, 3H), 6.76-6.72 (m, 2H), 6.28-6.27 (m, 1H), 3.97 (t,  $J = 10.8$  Hz, 1H), 3.78-3.72 (m, 1H), 3.38 (dd,  $J = 6.3, 10.8$  Hz, 1H), 1.43 (s, 3H) ppm; <sup>13</sup>C NMR (75 MHz, CDCl<sub>3</sub>):  $\delta = 141.70, 135.43, 132.99, 129.16, 128.71, 128.24, 127.96, 127.37, 127.08, 125.51, 56.07, 52.20, 11.93$  ppm; IR (KBr):  $\nu = 3064, 2878, 1581 \text{ cm}^{-1}$ ; MS (HRMS/[M+Na]<sup>+</sup>) Calcd for C<sub>17</sub>H<sub>17</sub>NO<sub>2</sub>SNa: 322.0872, Found: 322.0870.

**3-(4-tert-butylphenyl)-4-methyl-1-(phenylsulfonyl)-2**

**,3-dihydro-1H-pyrrole (2j)** White solid, m.p. 92-94 °C. <sup>1</sup>H NMR (300 MHz, CDCl<sub>3</sub>):

$\delta = 7.85\text{--}7.81$  (m, 2H),  $7.68\text{--}7.64$  (m, 1H),  $7.60\text{--}7.57$  (m, 2H),  $7.20\text{--}7.16$  (m, 2H),  $6.70\text{--}6.67$  (m, 2H),  $6.28\text{--}6.27$  (m, 1H),  $3.95$  (t,  $J = 10.8$  Hz, 1H),  $3.77\text{--}3.71$  (m, 1H),  $3.38$  (dd,  $J = 6.4, 10.8$  Hz, 1H),  $1.44$  (t,  $J = 1.1$  Hz, 3H),  $1.28$  (s, 9H) ppm;  $^{13}\text{C}$  NMR (75 MHz,  $\text{CDCl}_3$ ):  $\delta = 149.90, 138.52, 132.98, 129.16, 127.97, 127.80, 127.03, 125.58, 125.38, 125.31, 56.10, 51.69, 34.45, 31.36, 12.04$  ppm; IR (KBr):  $\nu = 3061, 2961, 2870, 1510, 1468$   $\text{cm}^{-1}$ ; MS (HRMS/[ $\text{M}+\text{Na}$ ] $^+$ ) Calcd for  $\text{C}_{21}\text{H}_{25}\text{NO}_2\text{SNa}$ : 378.1498, Found: 378.1486.

**3-(4-*tert*-butylphenyl)-4-methylene-1-(phenylsulfonyl)pyrrolidine (4j)** White solid, m.p.  $115\text{--}117$   $^\circ\text{C}$ .  $^1\text{H}$  NMR (300 MHz,  $\text{CDCl}_3$ ):  $\delta = 7.87\text{--}7.84$  (m, 2H),  $7.65\text{--}7.62$  (m, 1H),  $7.60\text{--}7.56$  (m, 2H),  $7.32\text{--}7.28$  (m, 2H),  $7.06\text{--}7.02$  (m, 2H),  $5.03$  (d,  $J = 2.0$  Hz, 1H),  $4.69$  (d,  $J = 2.2$  Hz, 1H),  $4.16\text{--}4.09$  (m, 1H),  $3.96\text{--}3.90$  (m, 1H),  $3.83\text{--}3.75$  (m, 2H),  $3.24\text{--}3.15$  (m, 1H),  $1.30$  (s, 9H) ppm;  $^{13}\text{C}$  NMR (75 MHz,  $\text{CDCl}_3$ ):  $\delta = 148.04, 136.39, 132.99, 129.18, 127.97, 127.87, 127.79, 127.02, 125.61, 109.23, 55.52, 52.49, 48.92, 34.44, 31.35$  ppm; IR (KBr):  $\nu = 3061, 2960, 2868, 1510, 1470$   $\text{cm}^{-1}$ ; MS (HRMS/[ $\text{M}+\text{Na}$ ] $^+$ ) Calcd for  $\text{C}_{21}\text{H}_{25}\text{NO}_2\text{SNa}$ : 378.1498, Found: 378.1503.

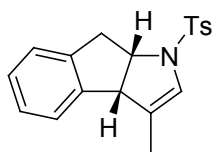

**3-methyl-1-tosyl-1,3a,8,8a-tetrahydroindeno[2,1-*b*]pyrrole (2k)**

White solid, m.p.  $148\text{--}150$   $^\circ\text{C}$ ;  $^1\text{H}$  NMR (300 MHz,  $\text{CDCl}_3$ ):  $\delta = 7.71\text{--}7.75$  (m, 2H),  $7.35$  (d,  $J = 7.9$  Hz, 2H),  $7.16\text{--}7.1624$  (m, 4H),  $6.03$  (s, 1H),  $4.54\text{--}4.61$  (m, 1H),  $4.00\text{--}4.04$  (m, 1H),  $3.41\text{--}3.55$  (m, 2H),  $2.46$  (s, 3H),  $1.76\text{--}1.75$  (m, 3H) ppm;  $^{13}\text{C}$  NMR (75 MHz,  $\text{CDCl}_3$ ):  $\delta = 143.76, 141.20, 140.89, 133.75, 129.84, 129.73, 127.70, 127.50, 126.73, 125.12, 124.14, 124.05, 64.28, 57.71, 41.22, 21.68, 12.28$  ppm; IR (KBr):  $\nu = 2975, 2922, 1452$   $\text{cm}^{-1}$ ; MS (HRMS/[ $\text{M}+\text{Na}$ ] $^+$ ) Calcd for  $\text{C}_{19}\text{H}_{19}\text{NO}_2\text{SNa}$ : 348.1029, Found: 348.1016.

**3-methylene-1-tosyl-1,2,3,3a,8,8a-hexahydroindeno[2,1-*b*]pyrrole**

(**4k**) White solid, m.p. 157–159 °C; <sup>1</sup>H NMR (300 MHz, CDCl<sub>3</sub>): δ = 7.75 (d, *J* = 8.2 Hz, 2H), 7.34 (d, *J* = 8.3 Hz, 2H), 7.20–7.24 (m, 4H), 5.12–5.14 (m, 1H), 4.95 – 4.97 (m, 1H), 4.41–4.44 (m, 1H), 4.04–4.07 (m, 1H), 3.92 (s, 2H), 3.52 (dd, *J* = 2.1, 17.4 Hz, 1H), 3.29 (dd, *J* = 6.3, 17.4 Hz, 1H), 2.45 (s, 3H) ppm; <sup>13</sup>C NMR (75 MHz, CDCl<sub>3</sub>): δ = 145.92, 143.66, 141.31, 134.37, 129.83, 129.78, 127.80, 127.70, 126.93, 125.15, 123.97, 107.79, 65.09, 55.25, 53.29, 40.15, 21.62 ppm; IR (KBr): *ν* = 2914, 2857, 1666, 1595 cm<sup>-1</sup>; MS (HRMS/[M+Na]<sup>+</sup>) Calcd for C<sub>19</sub>H<sub>19</sub>NO<sub>2</sub>SNa: 348.1029, Found: 348.1022.



## 5. $^1\text{H}$ and $^{13}\text{C}$ NMR spectra for products 2, 3, 4

**2a**  $^1\text{H}$  NMR (300 MHz,  $\text{CDCl}_3$ ):

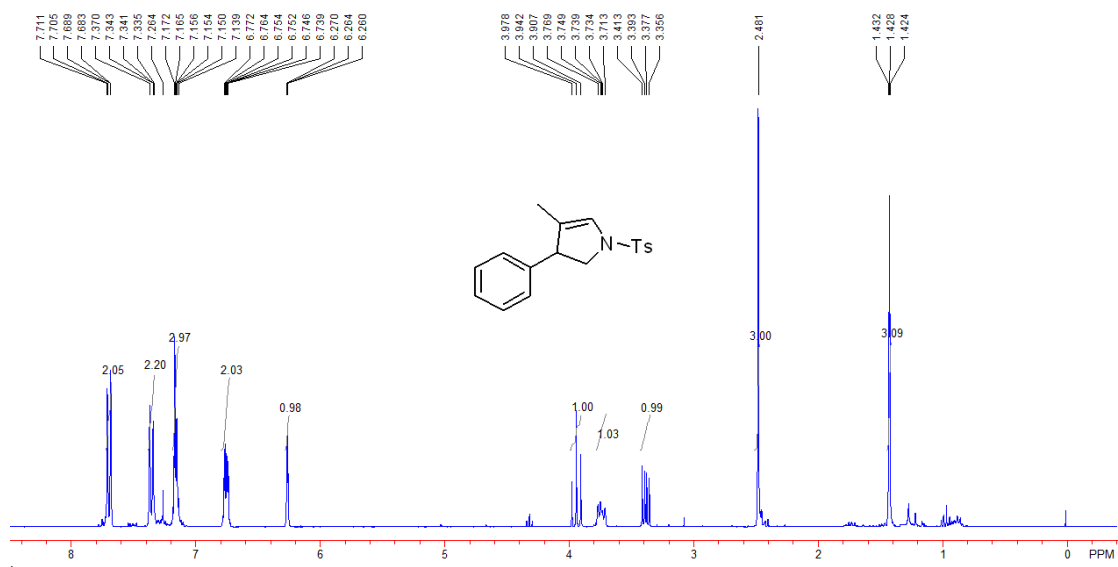

**2a**  $^{13}\text{C}$  NMR (75 MHz,  $\text{CDCl}_3$ ):

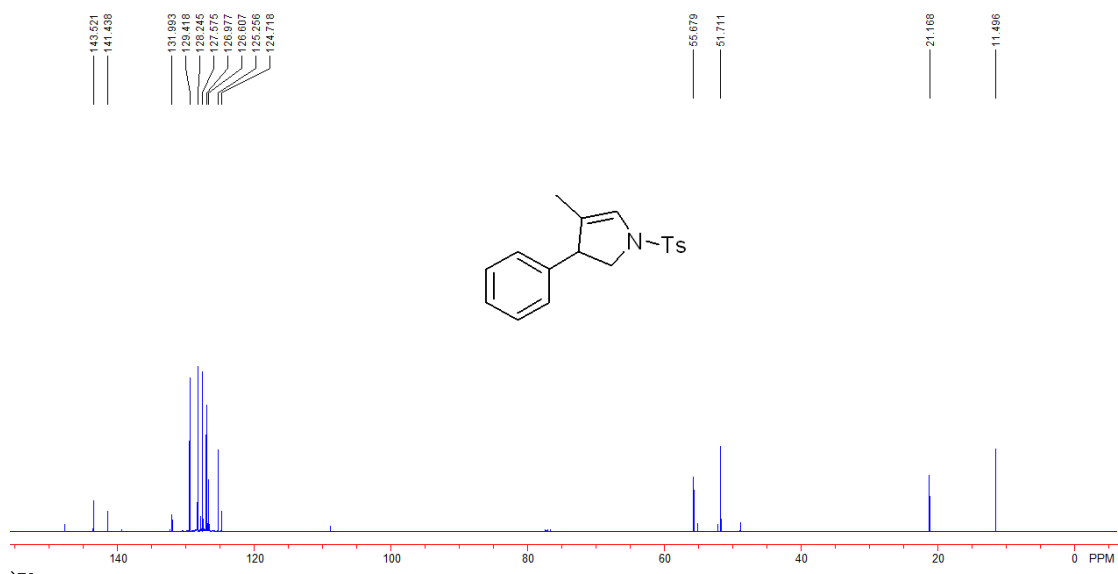

**2b**  $^1\text{H}$  NMR (300 MHz,  $\text{CDCl}_3$ ):

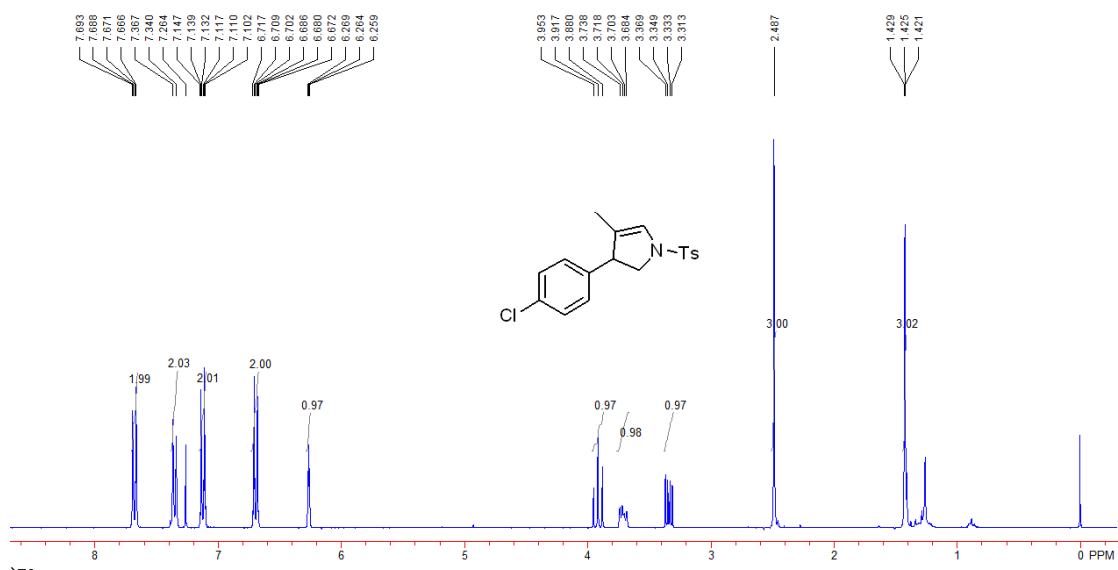

**2b**  $^{13}\text{C}$  NMR (75 MHz,  $\text{CDCl}_3$ ):

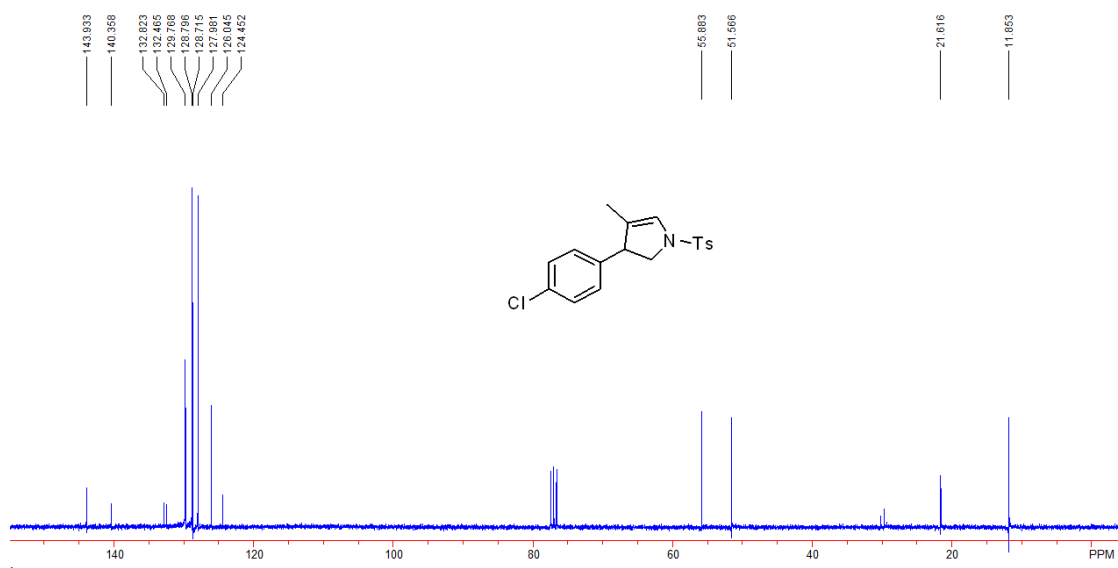

**2c**  $^1\text{H}$  NMR (300 MHz,  $\text{CDCl}_3$ ):

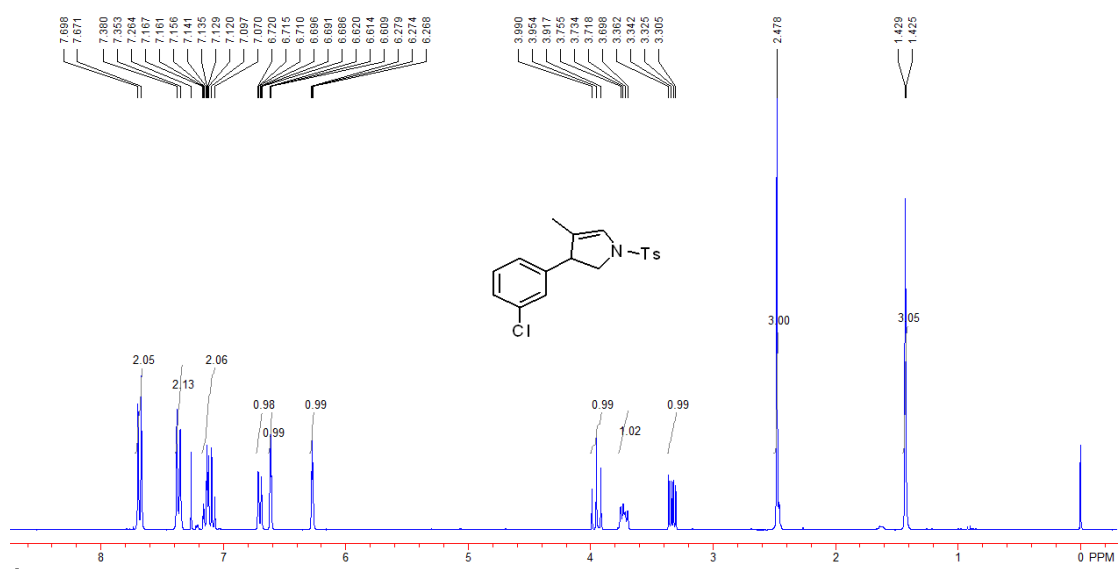

**2c**  $^{13}\text{C}$  NMR (75 MHz,  $\text{CDCl}_3$ ):

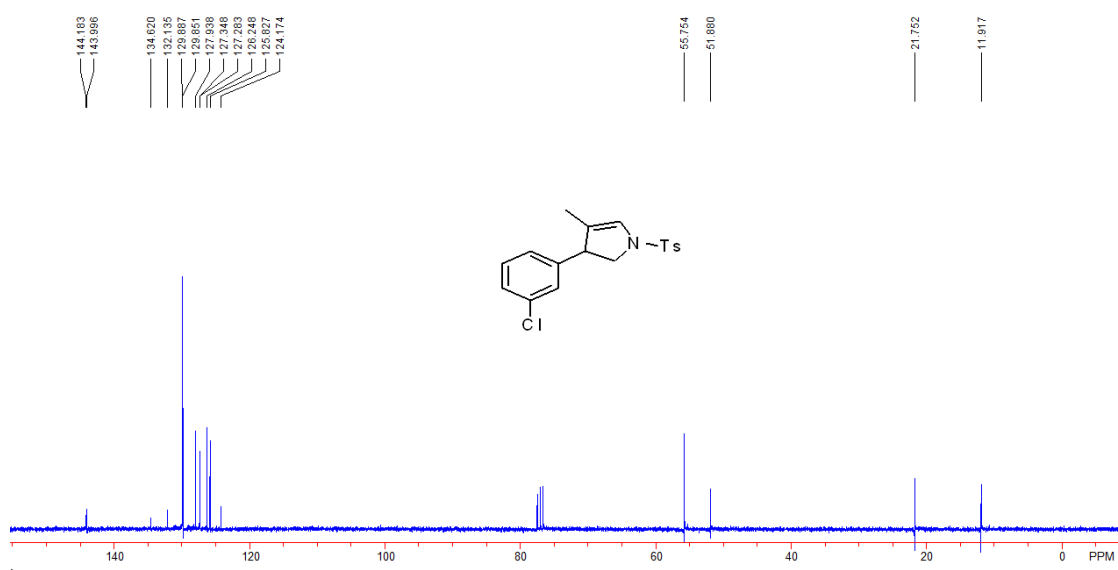

**2d**  $^1\text{H}$  NMR (300 MHz,  $\text{CDCl}_3$ ):

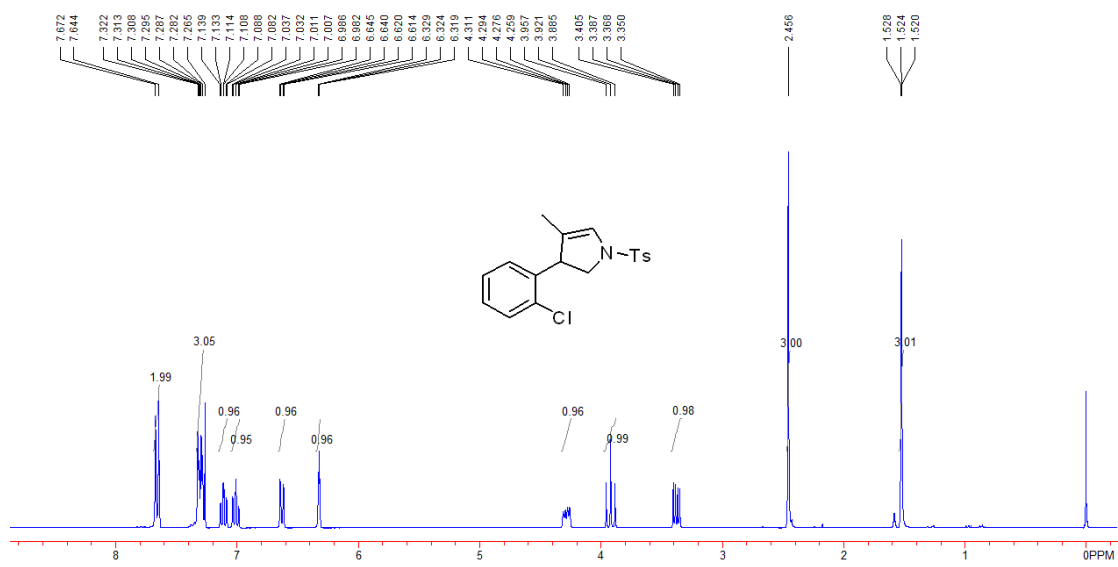

**2d**  $^{13}\text{C}$  NMR (75 MHz,  $\text{CDCl}_3$ ):

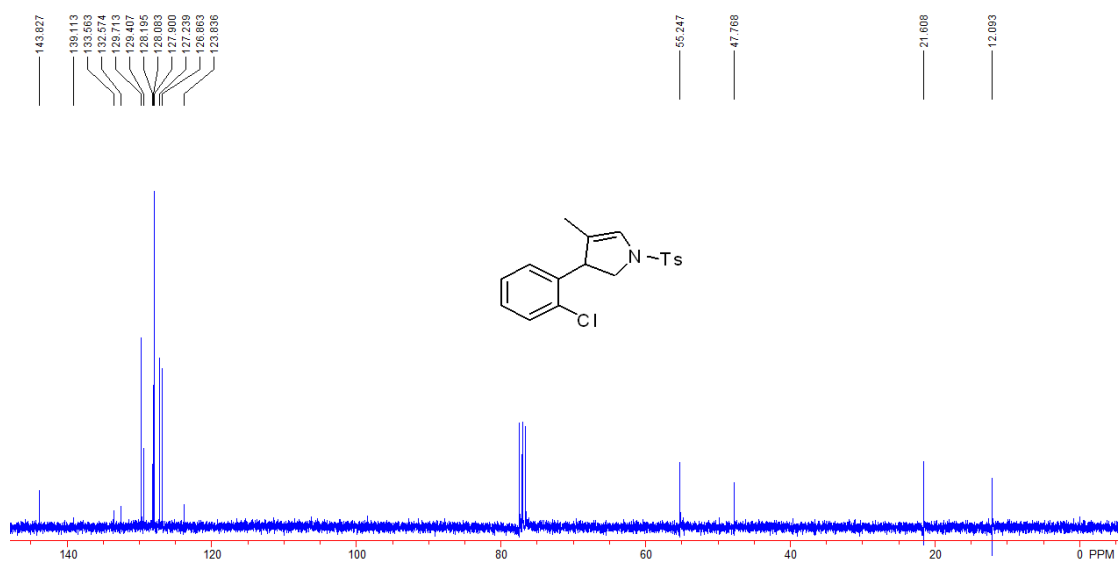

**2e**  $^1\text{H}$  NMR (300 MHz,  $\text{CDCl}_3$ ):

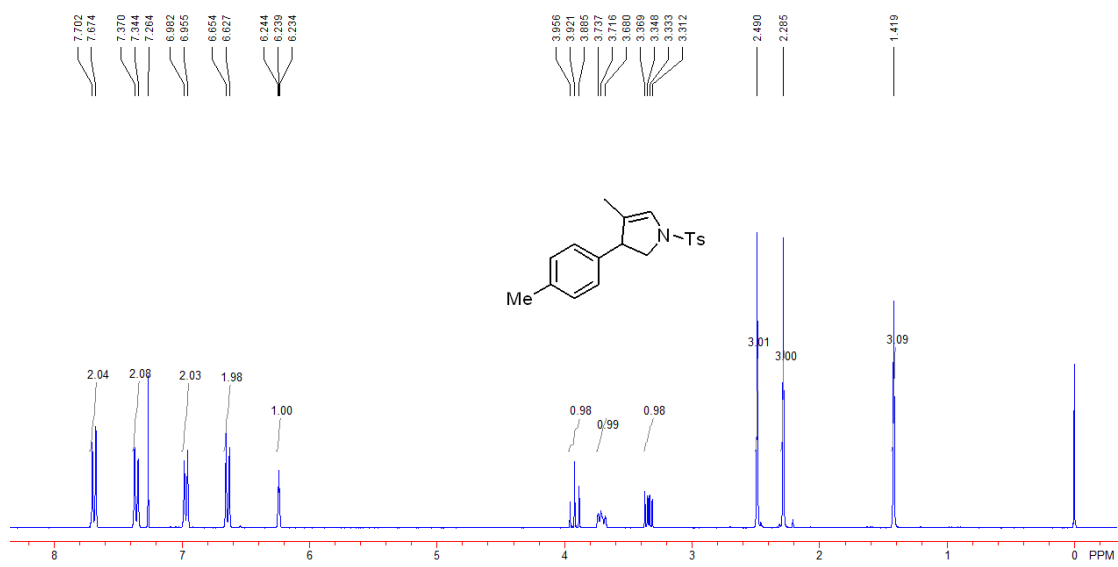

**2e**  $^{13}\text{C}$  NMR (75 MHz,  $\text{CDCl}_3$ ):

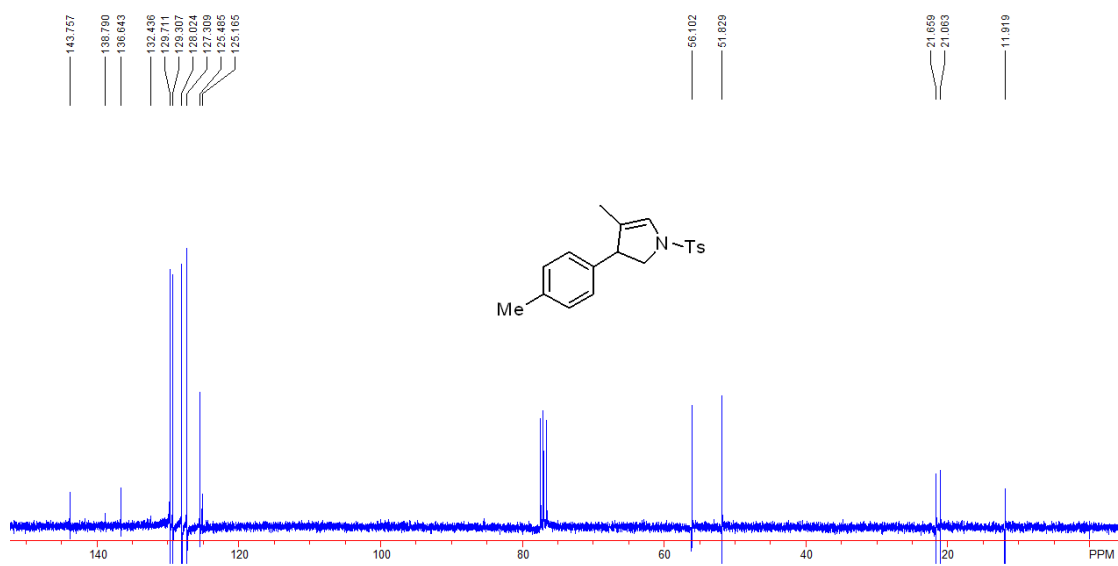

**2f**  $^1\text{H}$  NMR (300 MHz,  $\text{CDCl}_3$ ):

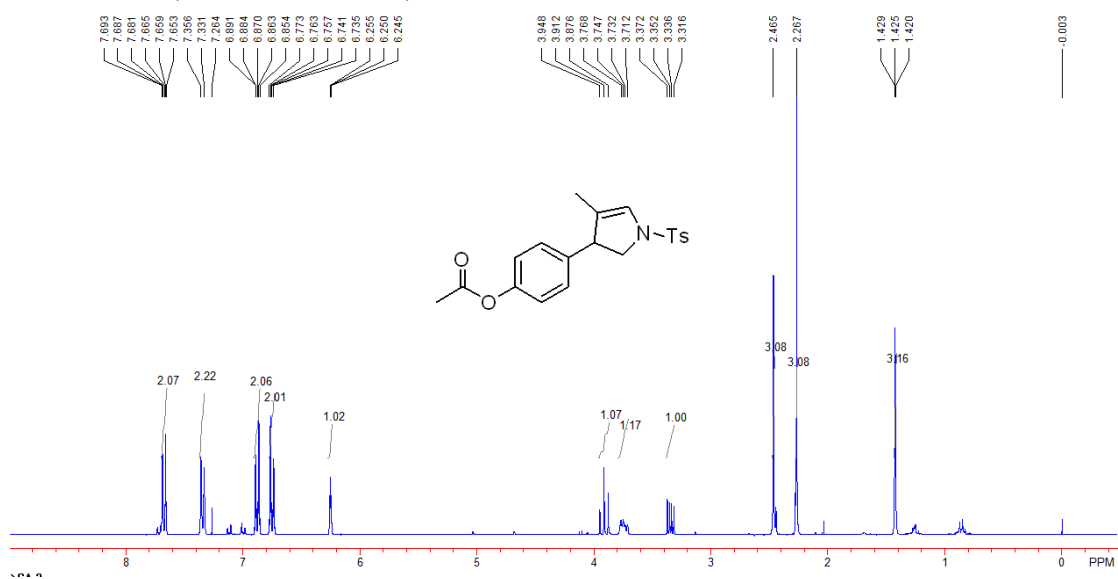

**2f**  $^{13}\text{C}$  NMR (75 MHz,  $\text{CDCl}_3$ ):

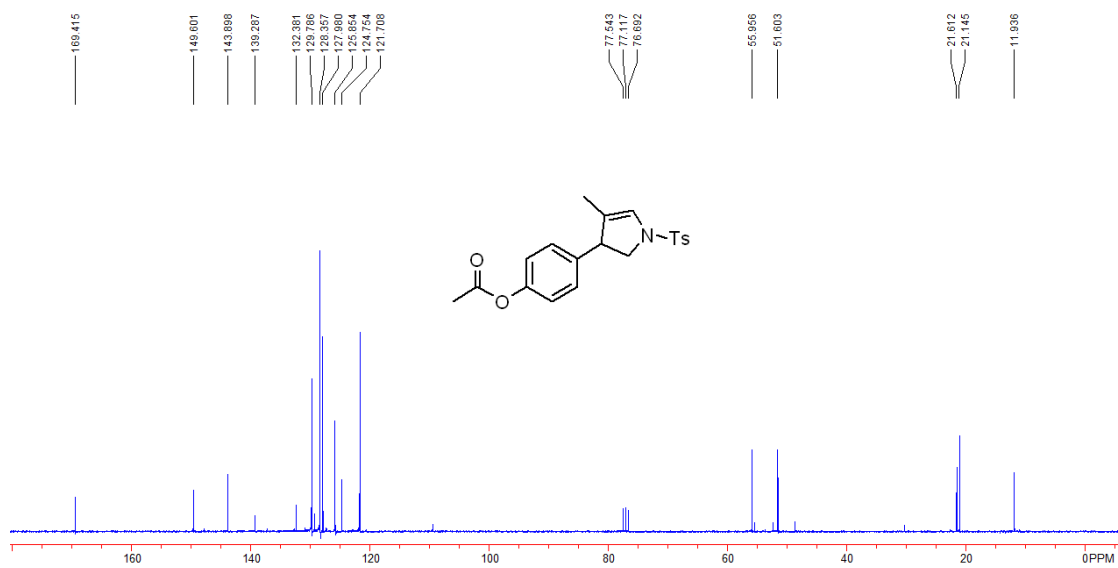

**2g**  $^1\text{H}$  NMR (300 MHz,  $\text{CDCl}_3$ ):

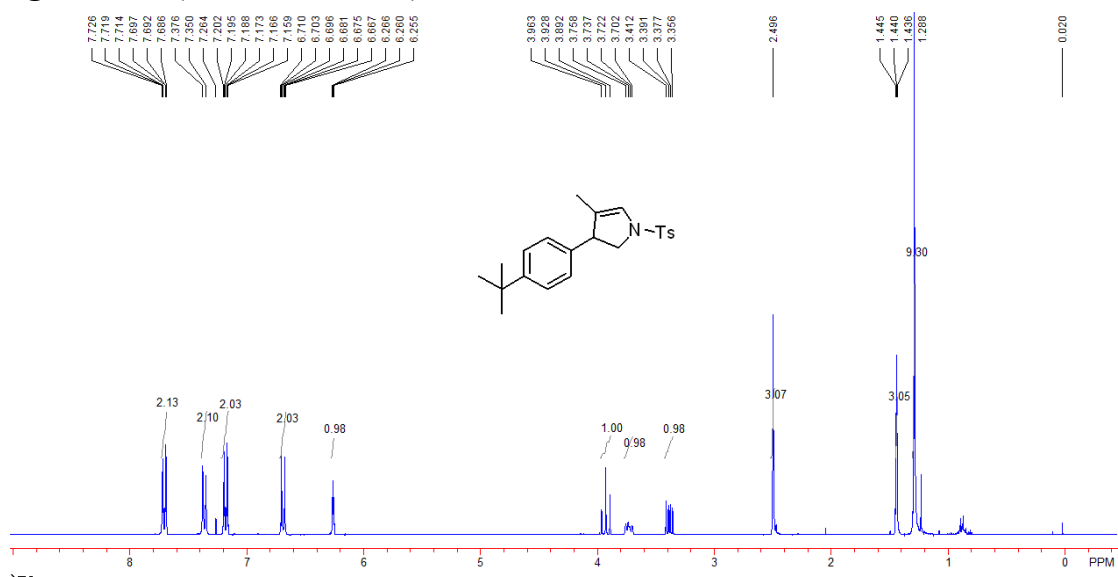

**2g**  $^{13}\text{C}$  NMR (75 MHz,  $\text{CDCl}_3$ ):

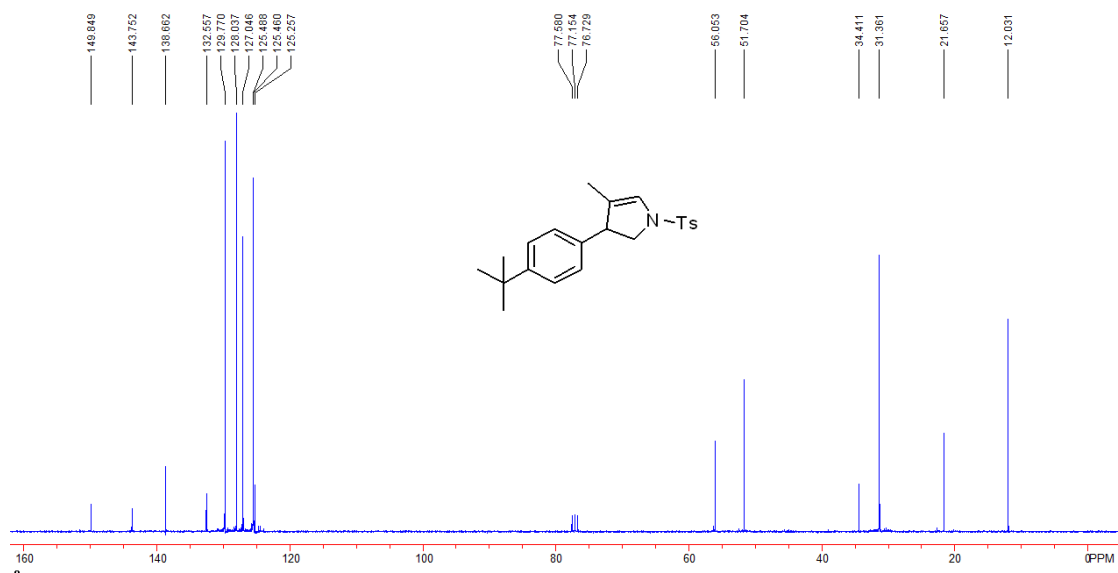

**2h**  $^1\text{H}$  NMR (300 MHz,  $\text{CDCl}_3$ ):

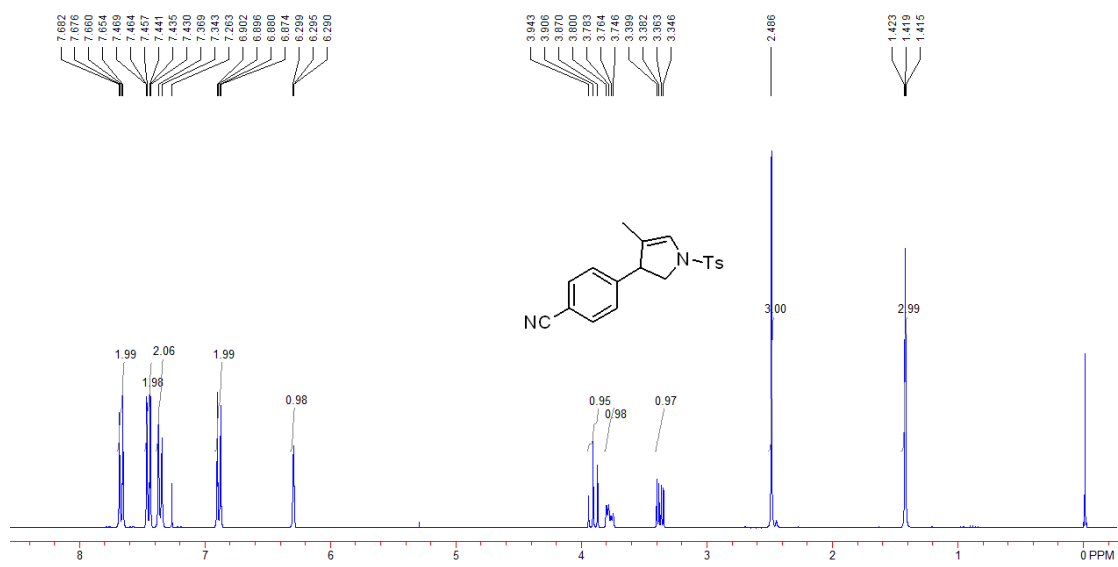

**2h**  $^{13}\text{C}$  NMR (75 MHz,  $\text{CDCl}_3$ ):

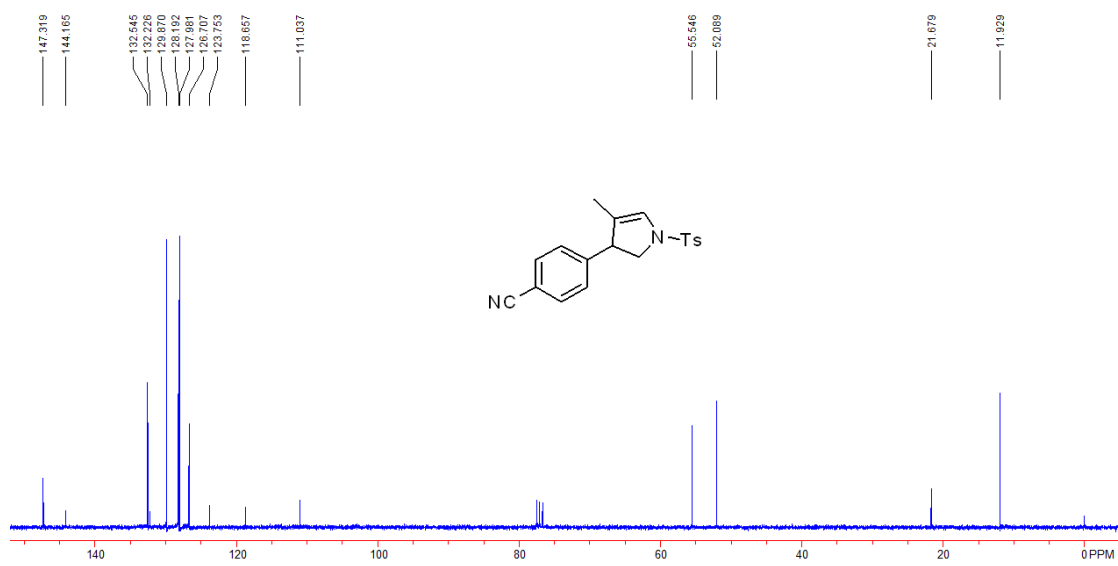



**3h**  $^1\text{H}$  NMR (300 MHz,  $\text{CDCl}_3$ ):

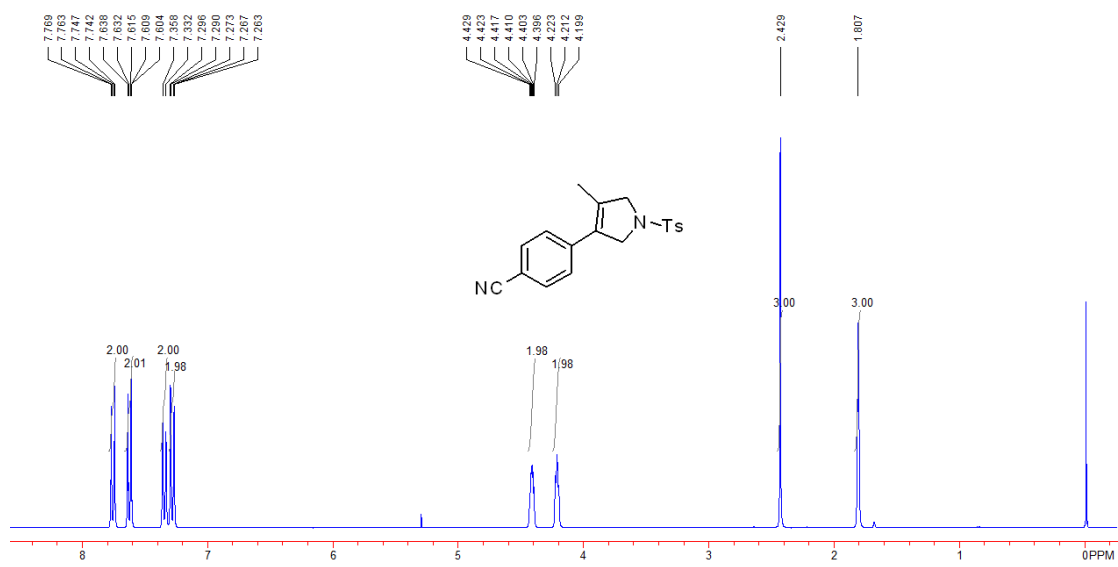

**3h**  $^{13}\text{C}$  NMR (75 MHz,  $\text{CDCl}_3$ ):

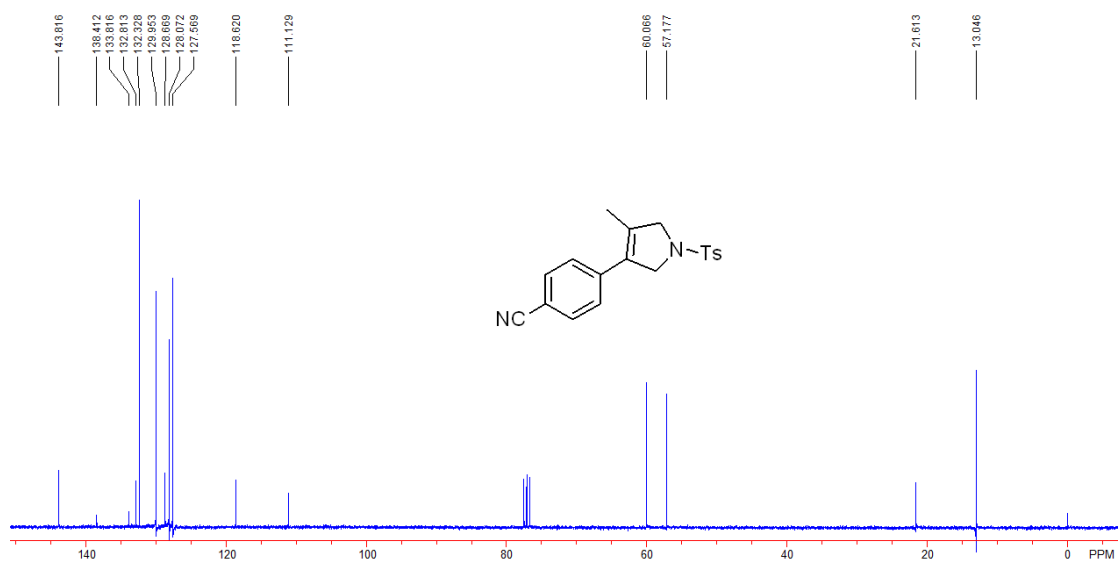

**2i**  $^1\text{H}$  NMR (300 MHz,  $\text{CDCl}_3$ ):

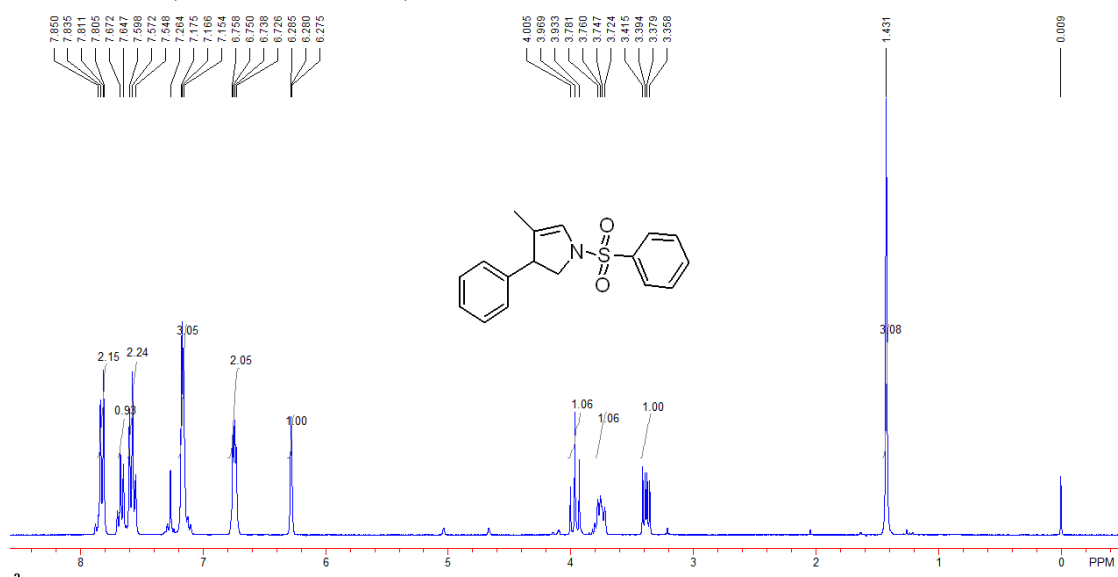

**2i**  $^{13}\text{C}$  NMR (75 MHz,  $\text{CDCl}_3$ ):

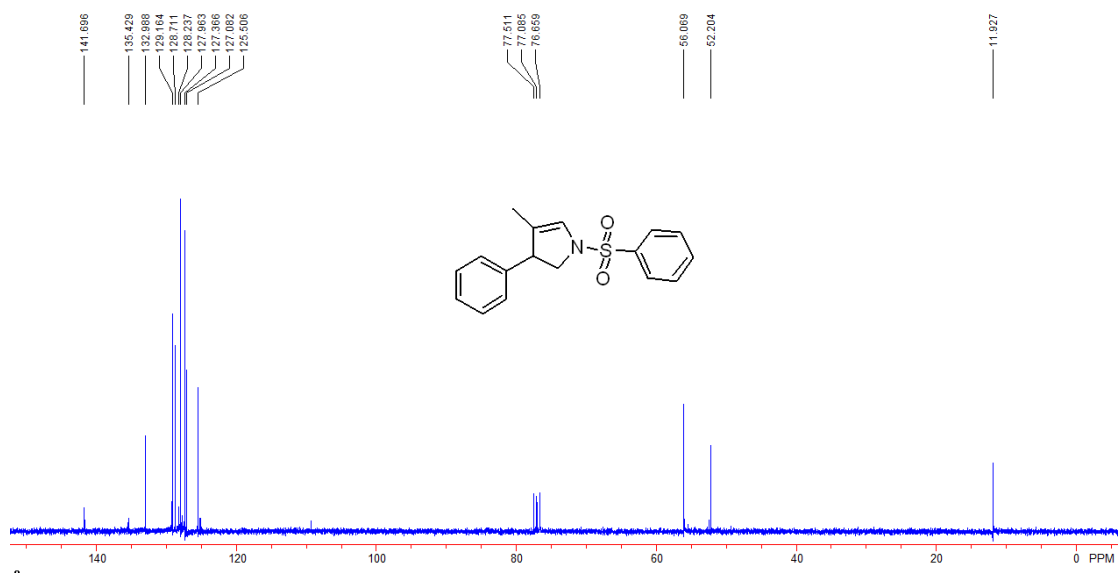

**2j**  $^1\text{H}$  NMR (300 MHz,  $\text{CDCl}_3$ ):

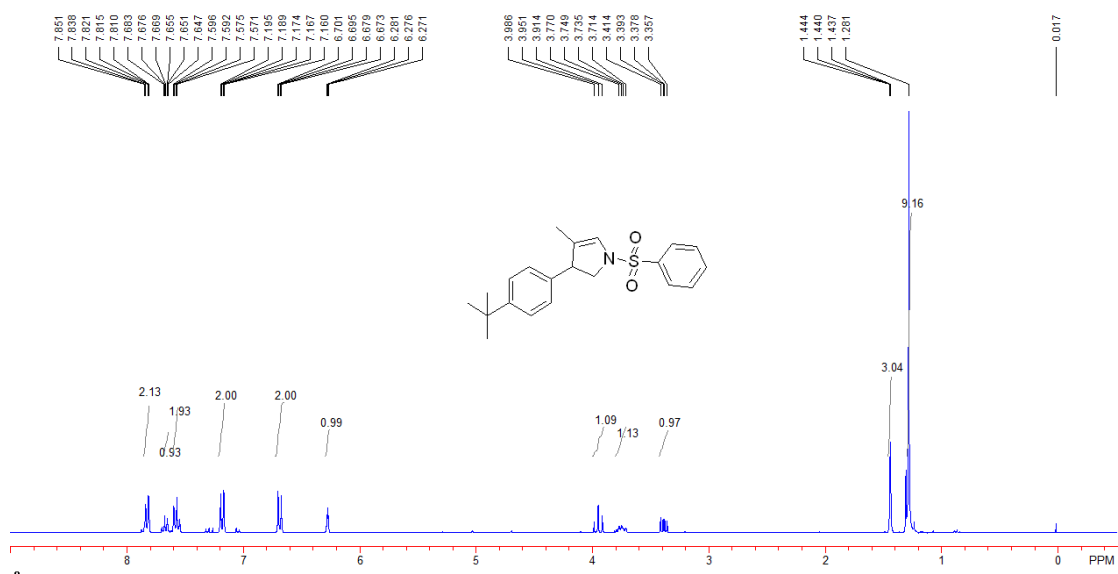

**2j**  $^{13}\text{C}$  NMR (75 MHz,  $\text{CDCl}_3$ ):

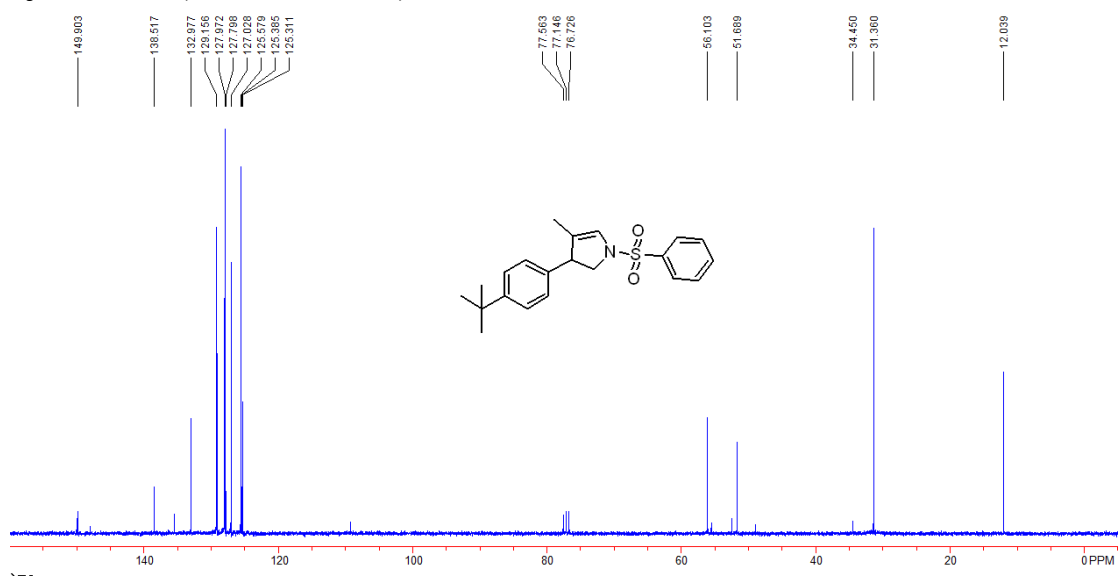

**4j**  $^1\text{H}$  NMR (300 MHz,  $\text{CDCl}_3$ ):

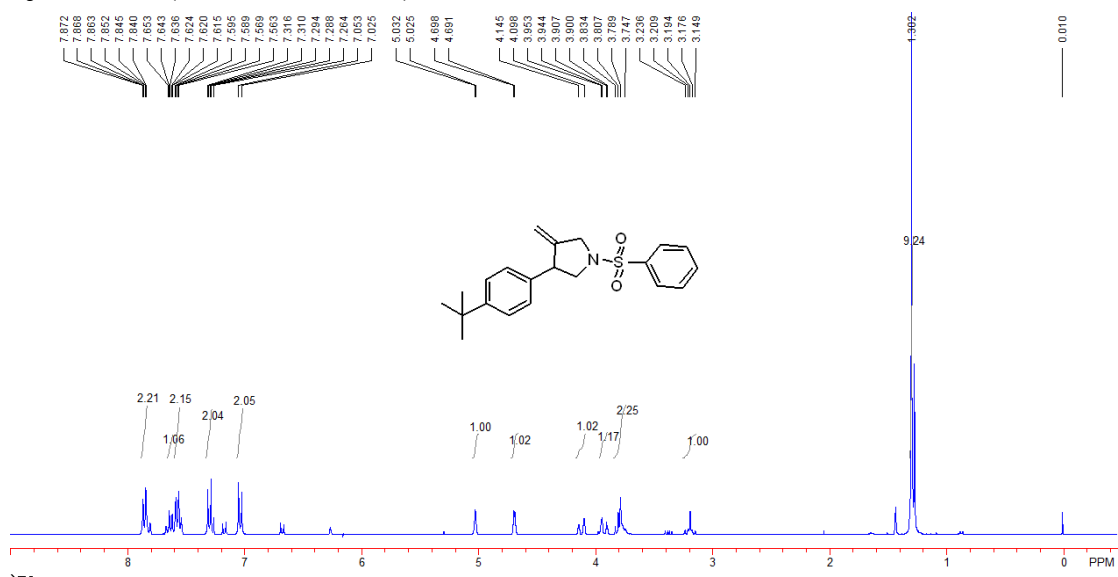

**4j**  $^{13}\text{C}$  NMR (75 MHz,  $\text{CDCl}_3$ ):

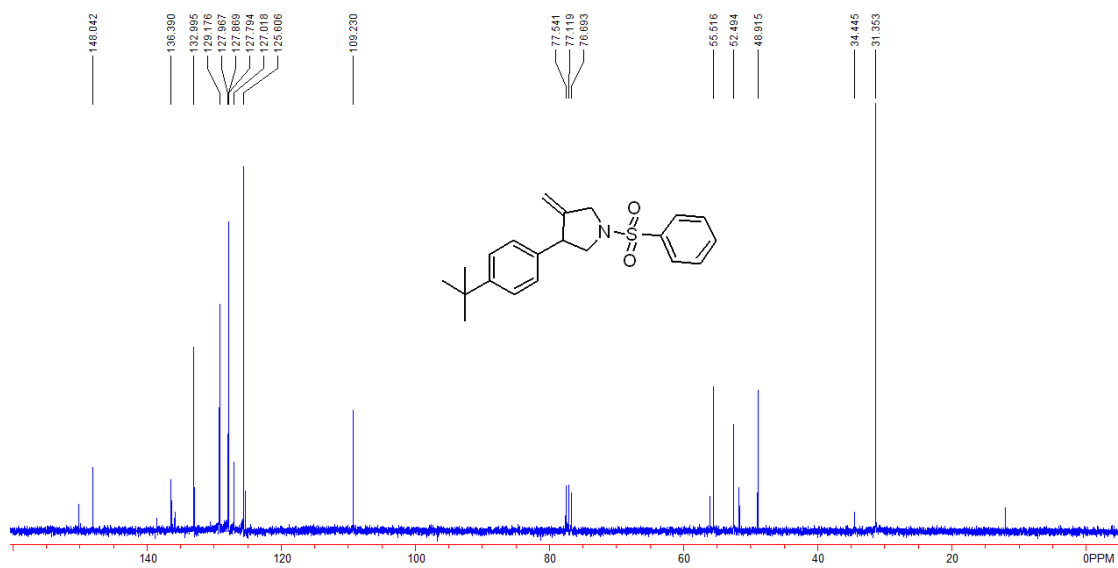

**2k**  $^1\text{H}$  NMR (300 MHz,  $\text{CDCl}_3$ ):

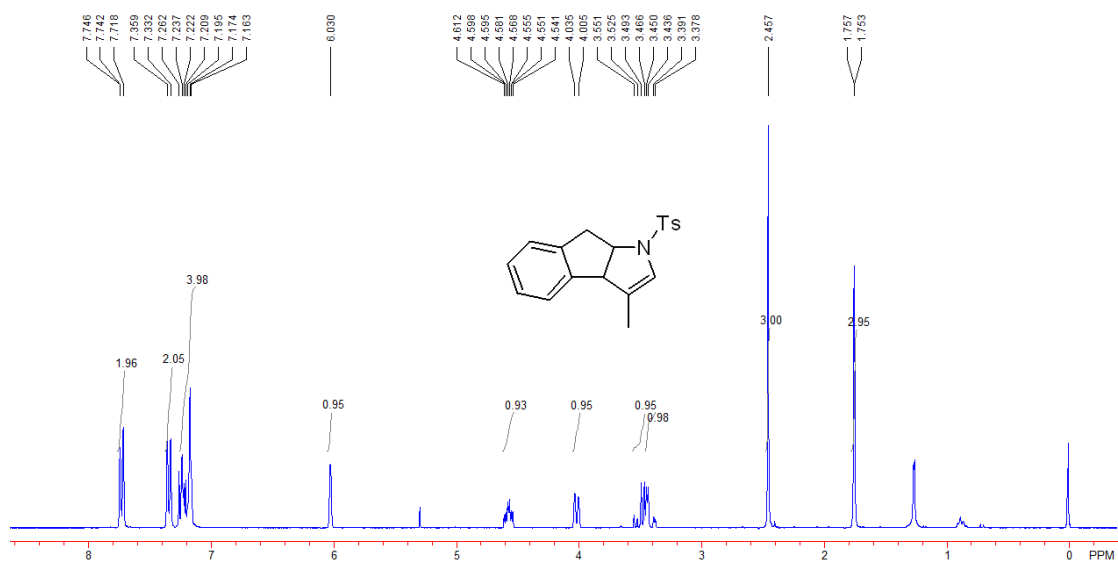

**2k**  $^{13}\text{C}$  NMR (75 MHz,  $\text{CDCl}_3$ ):

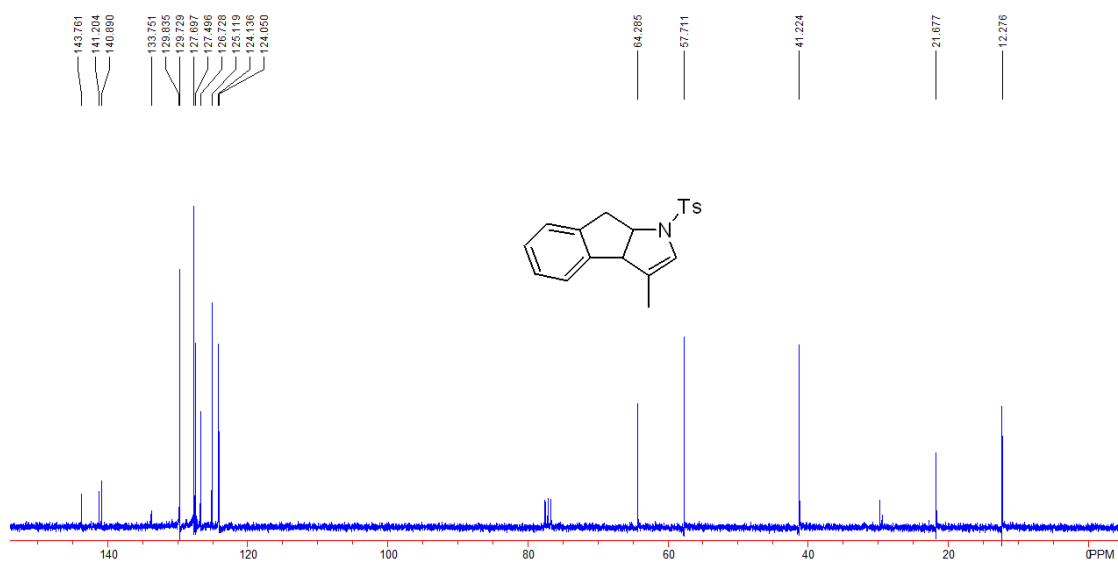

**4k**  $^1\text{H}$  NMR (300 MHz,  $\text{CDCl}_3$ ):

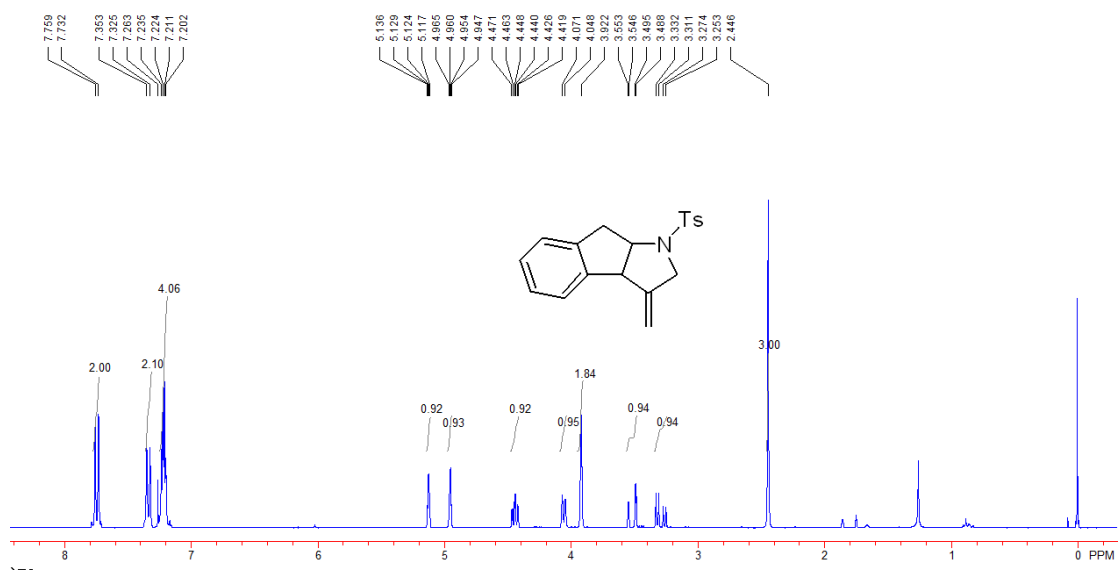

**4k**  $^{13}\text{C}$  NMR (75 MHz,  $\text{CDCl}_3$ ):

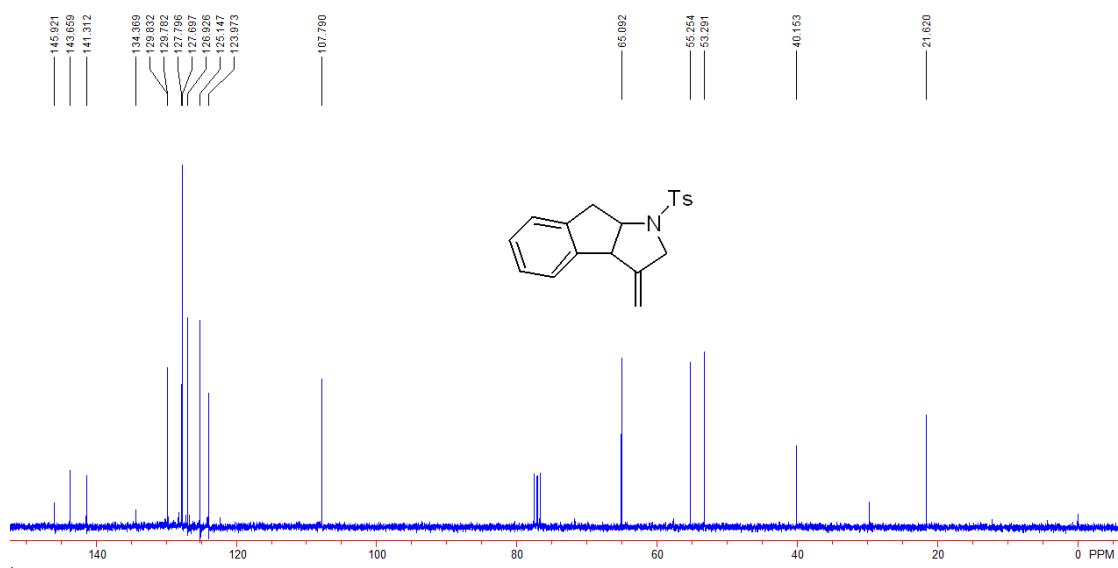

Supplement: c1ob05231d.pdf [file c1ob05231d.pdf]
